# Supplementary material for: Fossilized bioelectric wire – the trace fossil Trichichnus
Source: Copernicus journal article supplement (doi:10.5194/bg-12-2301-2015), 2015-04-16
Supplement: Supplementary file 1 [file bg-12-2301-2015-supplement.zip]

Video captured from an X-ray CT microscanner provides dimensional visualization of the dense *Trichichnus* fabric comparable with the upper part of the bacterial filamentous *Thioploca*-like mat system.
