# Supplementary material for: Fossilized bioelectric wire – the trace fossil Trichichnus
Source: Copernicus journal article supplement (doi:10.5194/bg-12-2301-2015), 2015-04-16
Supplement: Supplementary file 2 [file bg-12-2301-2015-supplement.zip]

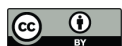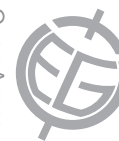

## *Supplement of*

# **Fossilized bioelectric wire – the trace fossil *Trichichnus***

**M. Kędzierski et al.**

*Correspondence to:* M. Kędzierski ([mariusz.kedzierski@uj.edu.pl](mailto:mariusz.kedzierski@uj.edu.pl))

- [bg-12-2301-2015-supplement-cover-letter.pdf](#)
- [Movie.wmv](#)
- [Supplement.pdf](#)
