# Supplementary material for: Fossilized bioelectric wire – the trace fossil Trichichnus
Source: Copernicus journal article supplement (doi:10.5194/bg-12-2301-2015), 2015-04-16
Supplement: Supplementary file 3 [file bg-12-2301-2015-supplement.zip]

Archive with 3 entries (3 files):
- Movie.wmv
- Supplement.pdf
- bg-12-2301-2015-supplement-cover-letter.pdf
